# Supplementary material for: Providing culturally appropriate mental health first aid to an Aboriginal or Torres Strait Islander adolescent: development of expert consensus guidelines
Source: PubMed Central journal article supplement (PMC3922159; doi:10.1186/1752-4458-8-6), 2014-01-28

**Overview of items included, excluded, created and re-rated in each round of the survey.**

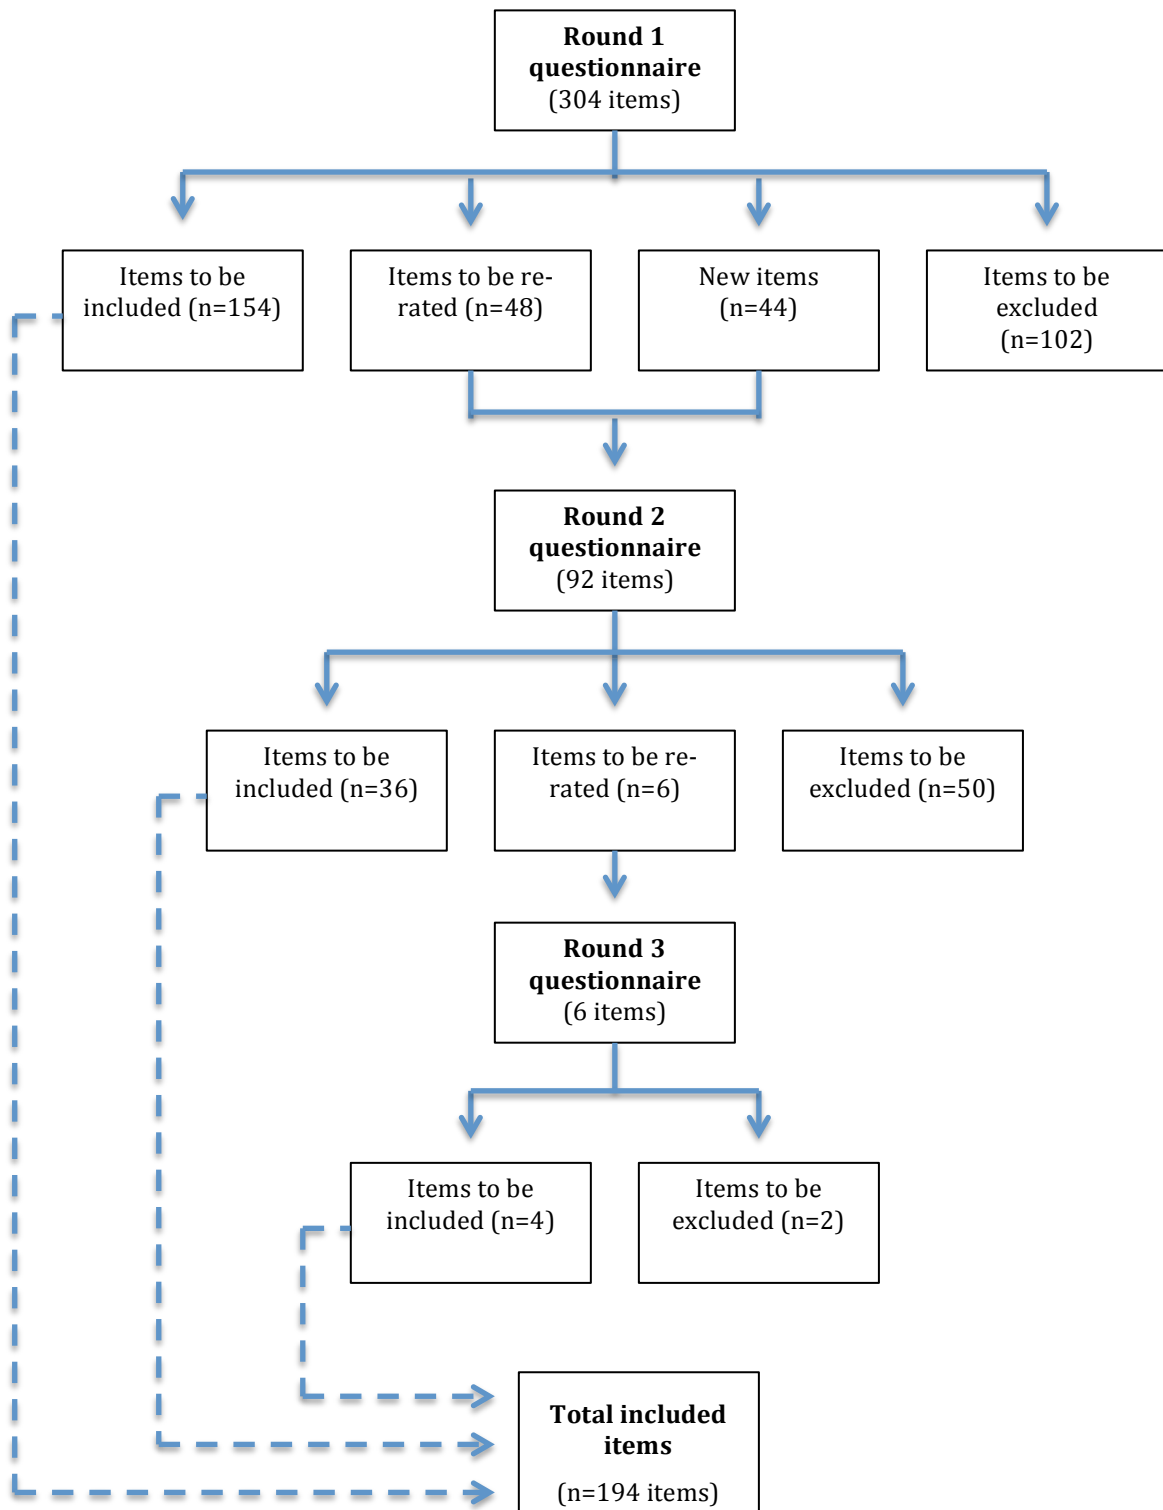

Supplement: 1752-4458-8-6-S1.pdf [file 1752-4458-8-6-S1.pdf]
